# Supplementary material for: Signal Peptide Efficiency: From High-Throughput Data to Prediction and Explanation
Source: PubMed Central journal article supplement (PMC9942255; doi:10.1021/acssynbio.2c00328), 2023-01-17

a

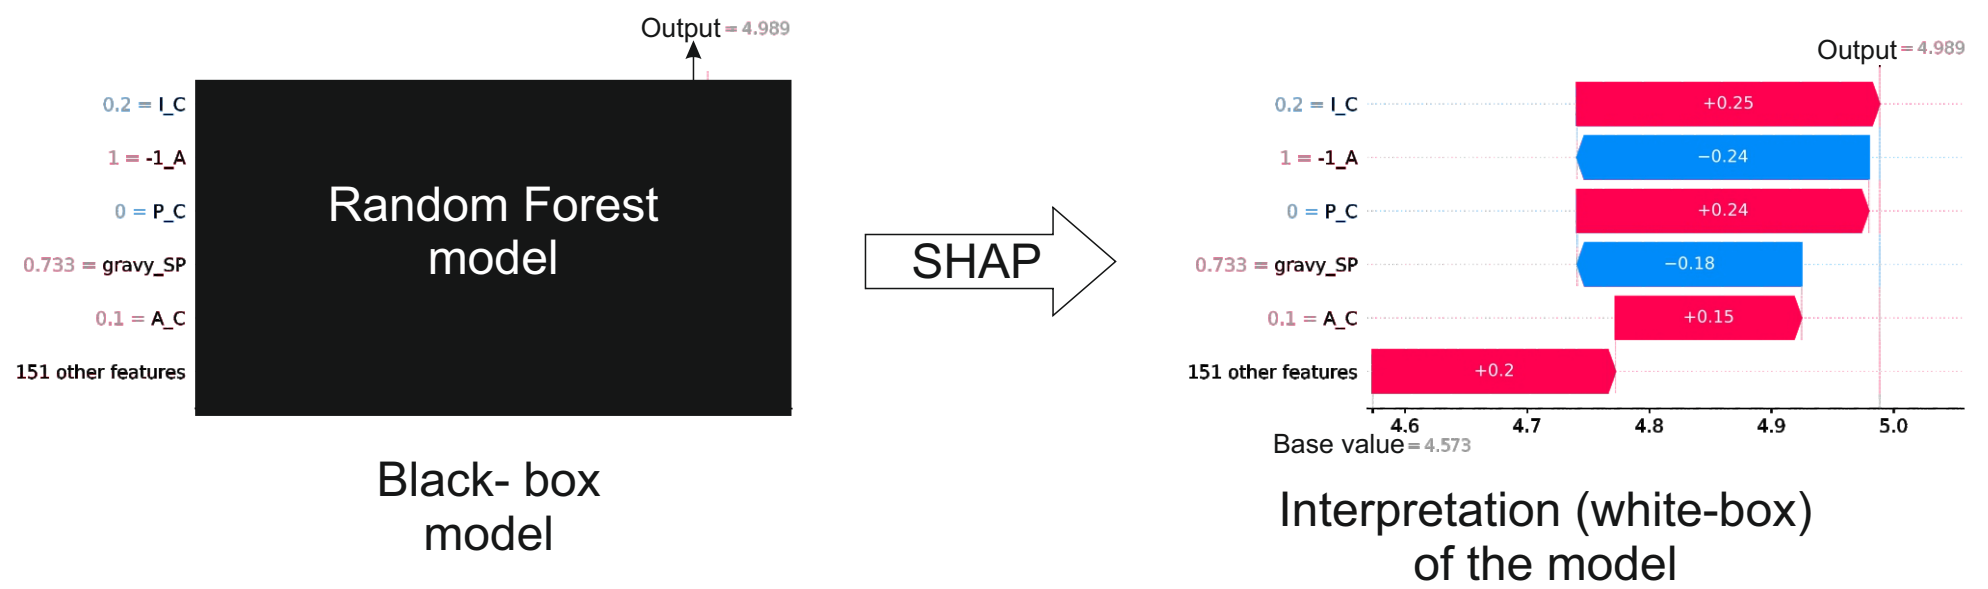

b

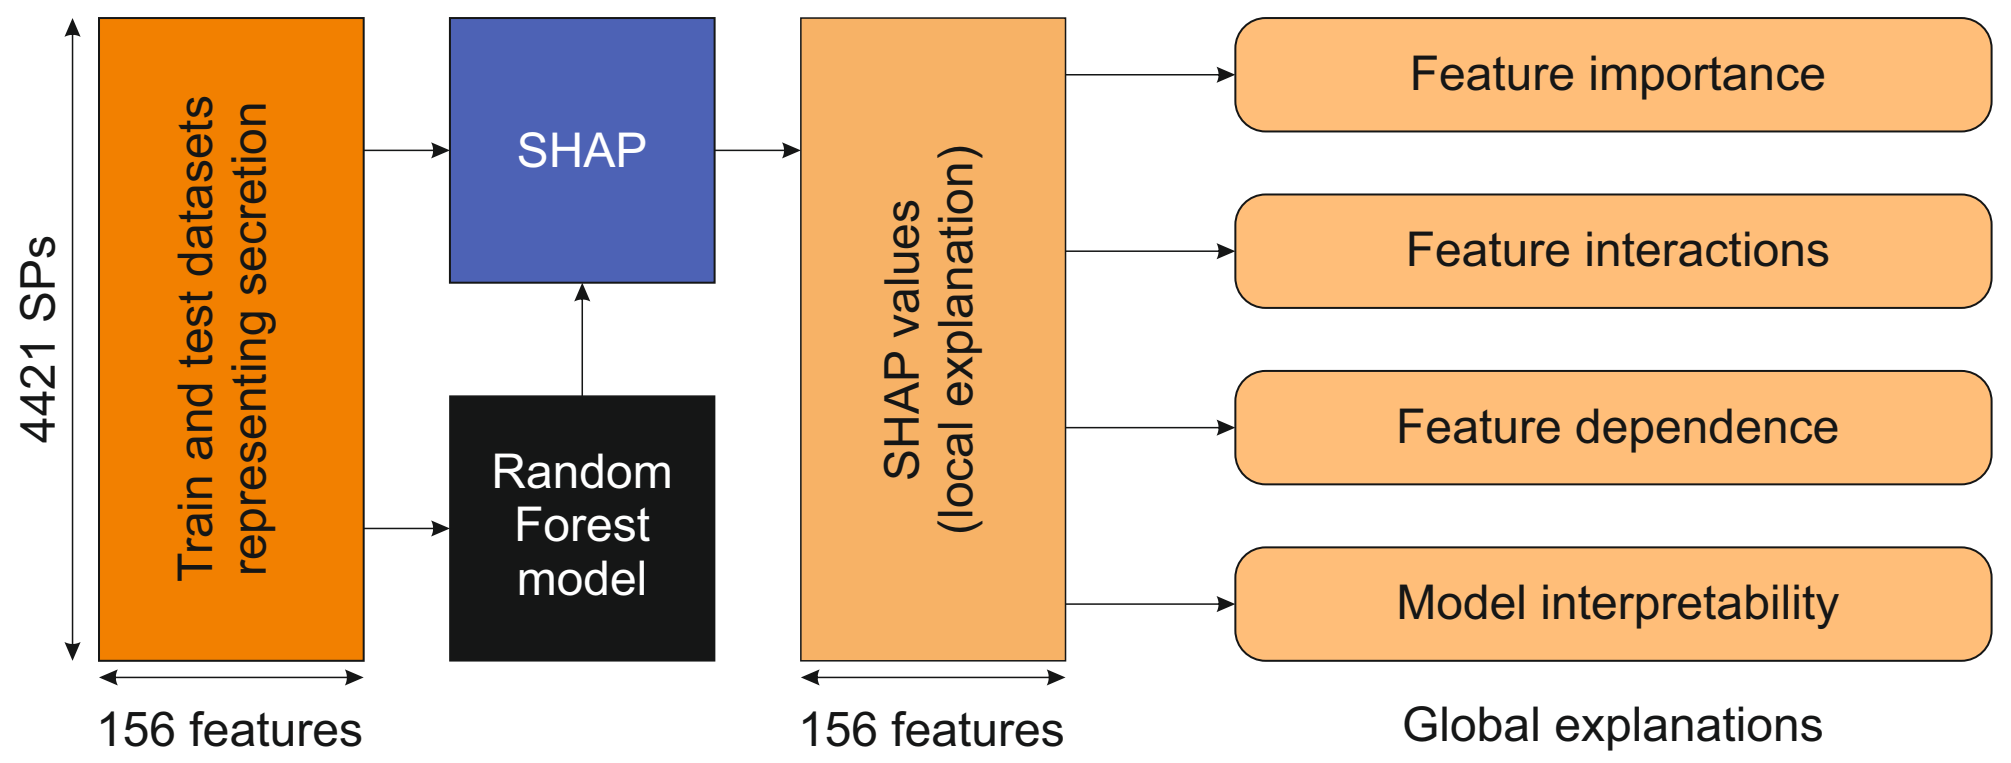

Supplement: sb2c00328_si_006.pdf [file sb2c00328_si_006.pdf]
